# Supplementary material for: 3D Pd/Co core–shell nanoneedle arrays as a high-performance cathode catalyst layer for AAEMFCs
Source: Royal Society of Chemistry journal article supplement (doi:10.1039/c7ra13677c), 2018-01-01
Supplement: c7ra13677c1.pdf [file c7ra13677c1.pdf]

## Supporting Information

### 3D Pd/Co core-shell nanoneedle arrays as high performance cathode catalyst layer for AAEMFCs

Jia Jia<sup>a,b</sup>, Hongmei Yu<sup>a,\*</sup>, Xueqiang Gao<sup>a,b</sup>, Jun Chi<sup>a,b</sup>, Yachao Zeng<sup>a,b</sup>, Bowen Qin<sup>a,b</sup>, Dewei Yao<sup>a,b</sup>, Wei Song<sup>a</sup>, Zhigang Shao<sup>a,\*</sup> and Baolian Yi<sup>a</sup>

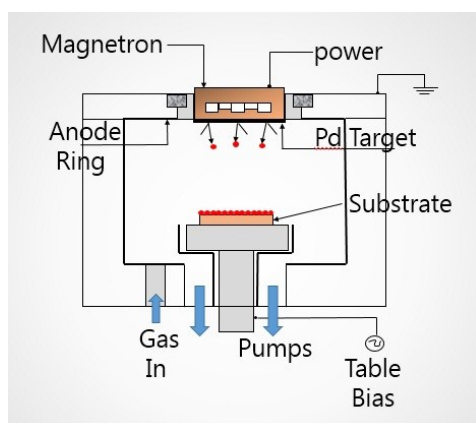

Fig. S1 The setup arrangement of sputtering deposition.

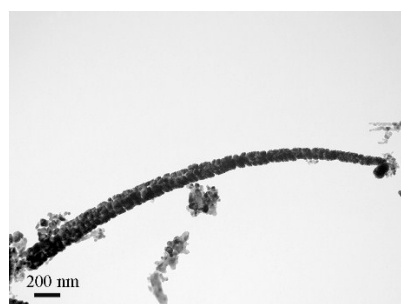

Fig. S2 low magnification TEM image of Pd/Co nanoneedle.

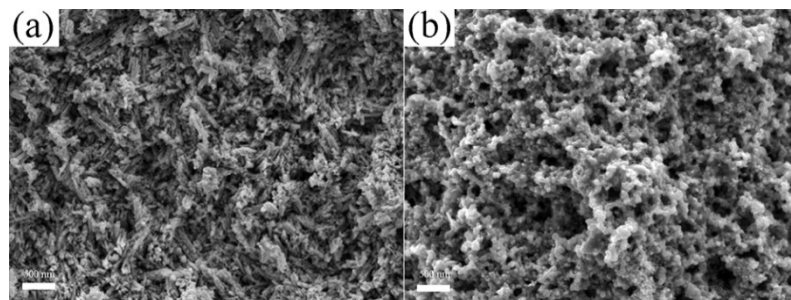

Fig. S3 The SEM images of the prepared catalyst layers coated on the membrane: (a) Pd/Co nanoneedle arrays, (b) conventional Pt/C catalyst layer.

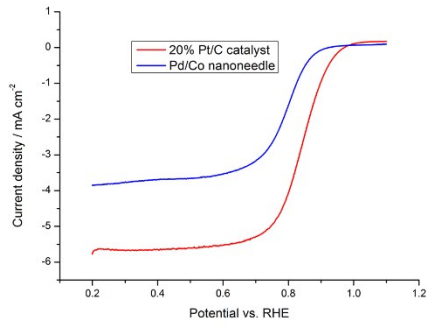

Fig. S4 ORR polarization curves for Pd/Co nanoneedle and 20% Pt/C catalyst. The measurements were performed in 1.0 M O<sub>2</sub>-saturated KOH solution. Scan rate: 10 mV s<sup>-1</sup>. Rotational speed: 1600 rpm.
